# Supplementary material for: Human Serum Metabolites as Potential Mediators from Type 2 Diabetes and Obesity to COVID-19 Severity and Susceptibility: Evidence from Mendelian Randomization Study
Source: MDPI journal article supplement (doi:10.3390/metabo12070598), 2022-06-27
Supplement: s1 [file s1]

# **Human Serum Metabolites as Potential Mediators from Type 2 Diabetes and Obesity to COVID-19 Severity and Susceptibility:**

## **Evidence from Mendelian Randomization Study**

**Huang et al.**

### **Supplementary Figures and Tables**

#### **Contents**

|                               |    |
|-------------------------------|----|
| Supplementary Figure S1. .... | 2  |
| Supplementary Figure S2. .... | 4  |
| Supplementary Figure S3. .... | 5  |
| Supplementary Figure S4. .... | 6  |
| Supplementary Table S1. ....  | 7  |
| Supplementary Table S2. ....  | 8  |
| Supplementary Table S3. ....  | 10 |
| Supplementary Table S4. ....  | 12 |
| Supplementary Table S5. ....  | 15 |
| Supplementary Table S6. ....  | 17 |
| Supplementary Table S7. ....  | 18 |
| Supplementary Tables 8. ....  | 20 |
| Supplementary Table S9. ....  | 21 |

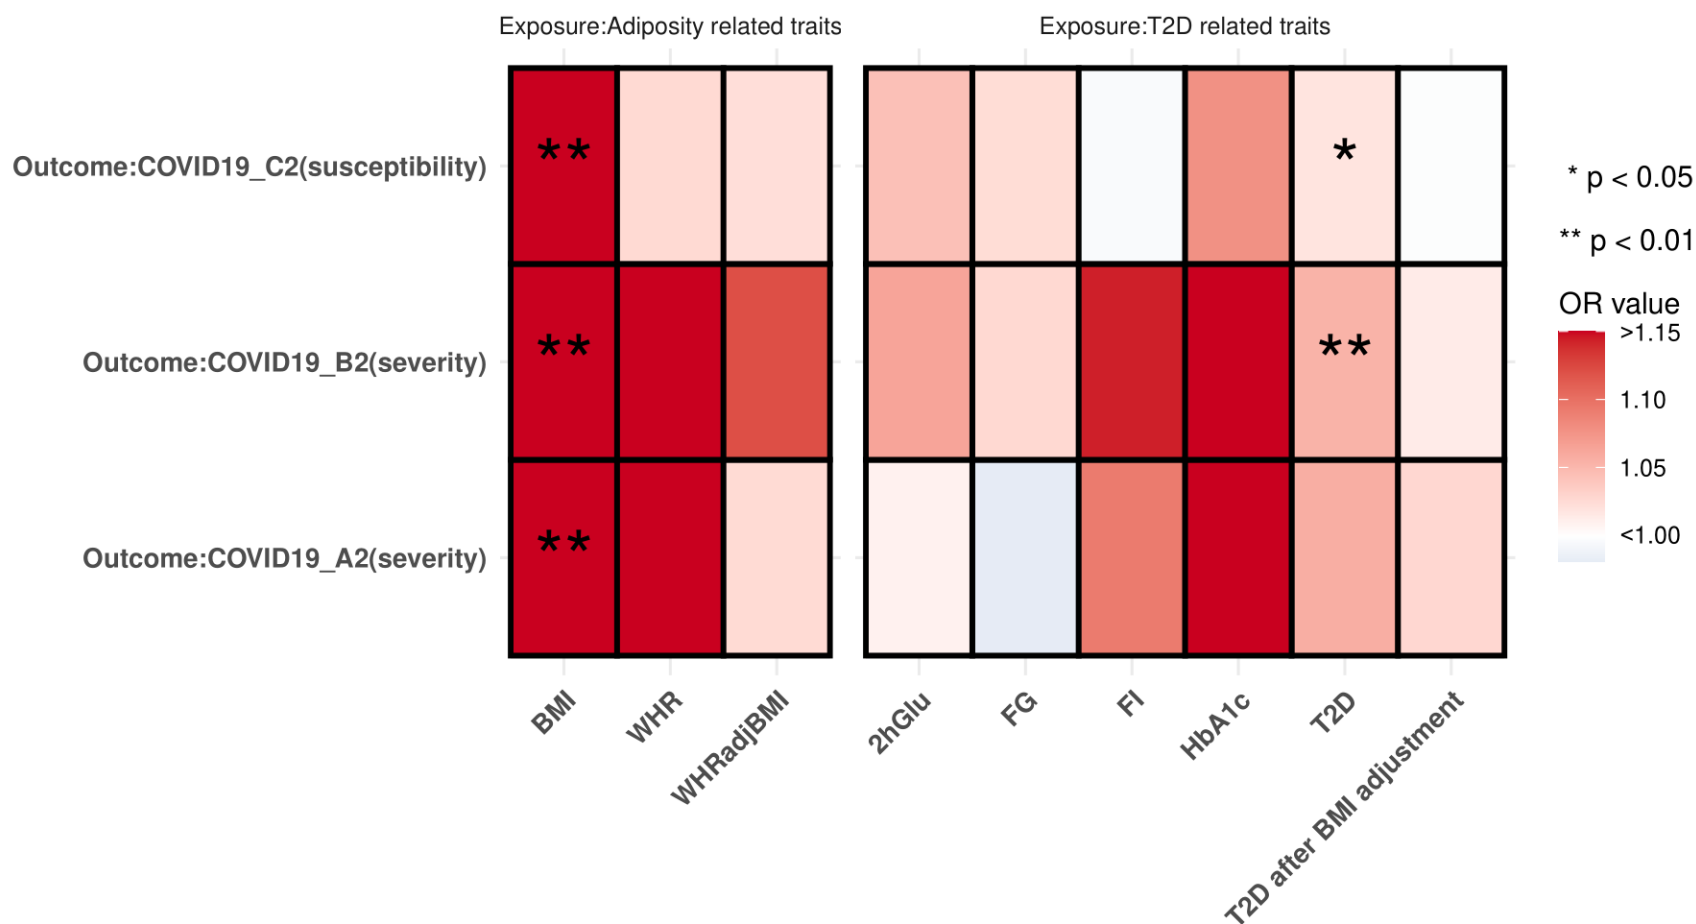

**Supplementary Figure S1.** Causal associations between metabolic traits and COVID-19 phenotypes. BMI: body mass index; WHR: waist-hip-ratio; WHRadjBMI: waist-hip-ratio with BMI adjustment; 2hGlu: 2h-glucose after an oral glucose challenge; FG: fasting glucose; HbA1c: glycated hemoglobin; T2D: type 2 diabetes; OR: odds ratio. The reported effect estimates and statistical significance were derived from the inverse-variance weighted method with multiplicative random-effects model. Number of asterisks indicates the level of statistical significance: \*\*  $P_{IVW} < 0.01$ ; \*  $P_{IVW} < 0.05$ .

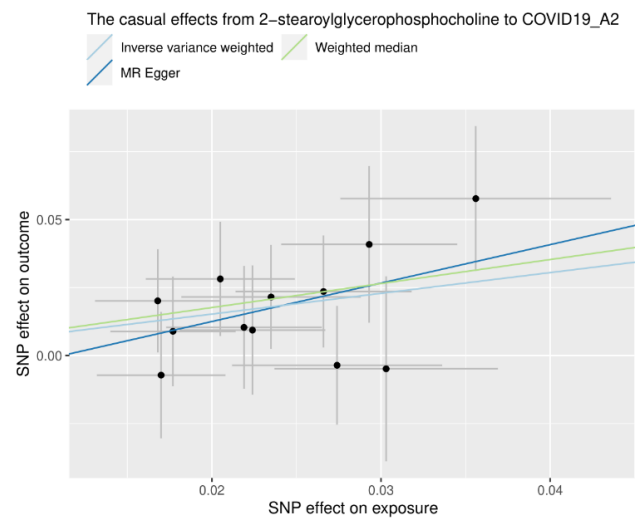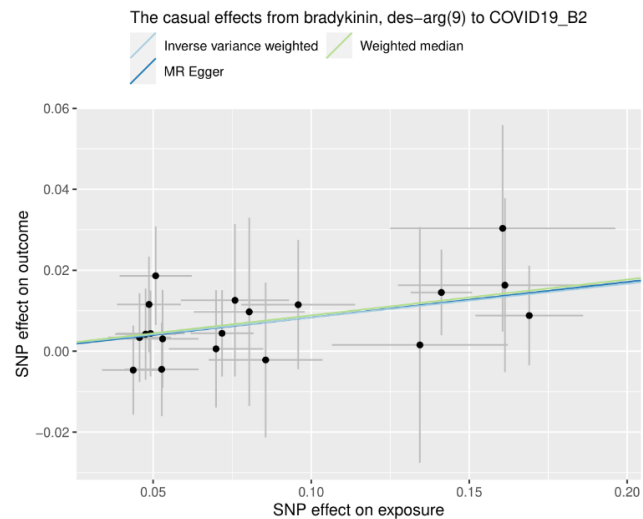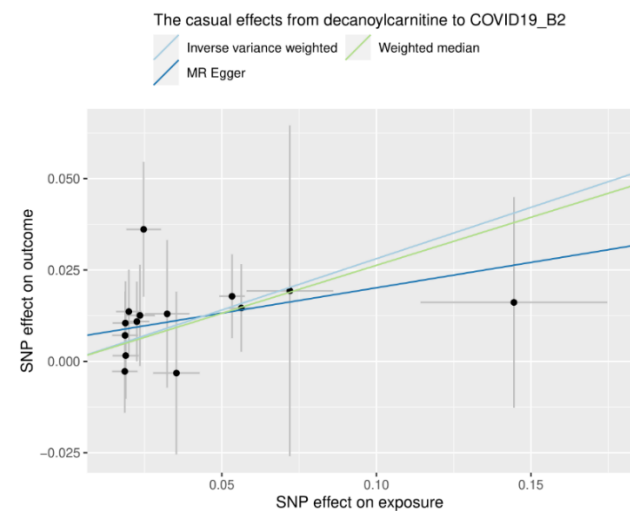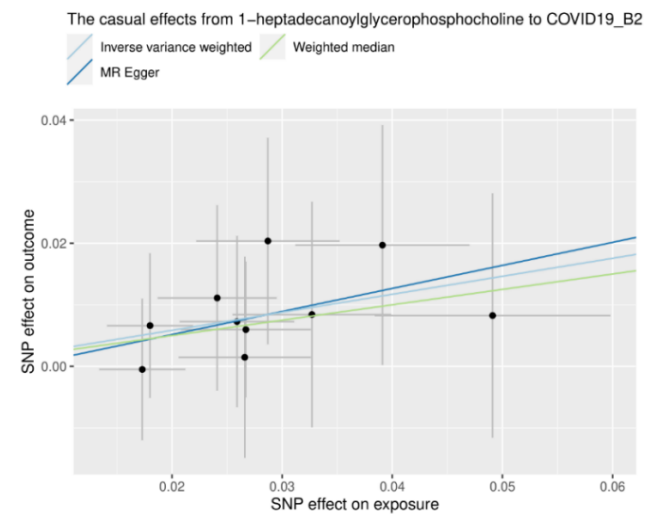

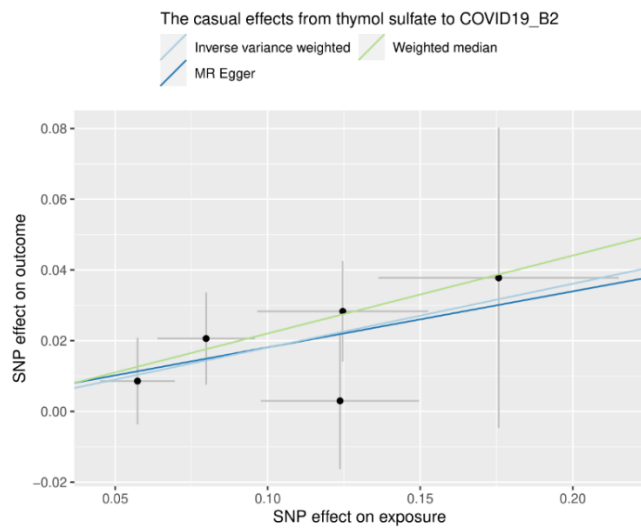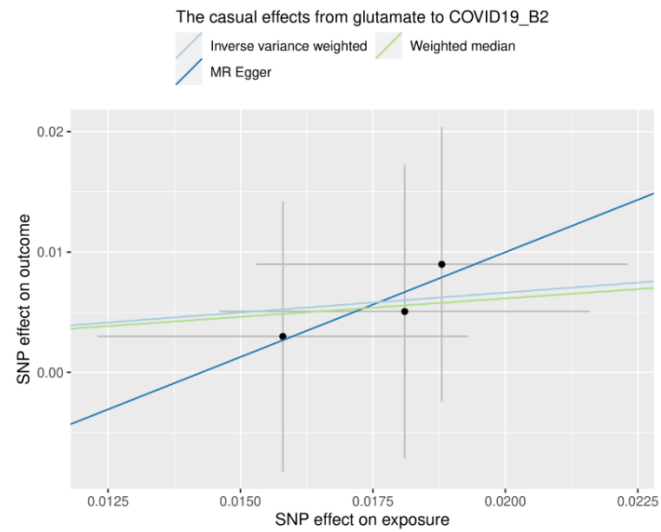

**Supplementary Figure S2.** Relationship of the SNP (instrument variable) effects on the metabolite serum levels against the SNP effects on the COVID-19 phenotypes estimated by three different MR methods for the six metabolites that passed the Bonferroni correction ( $P_{IVW} < 0.05/302 = 1.66 \times 10^{-4}$ ).

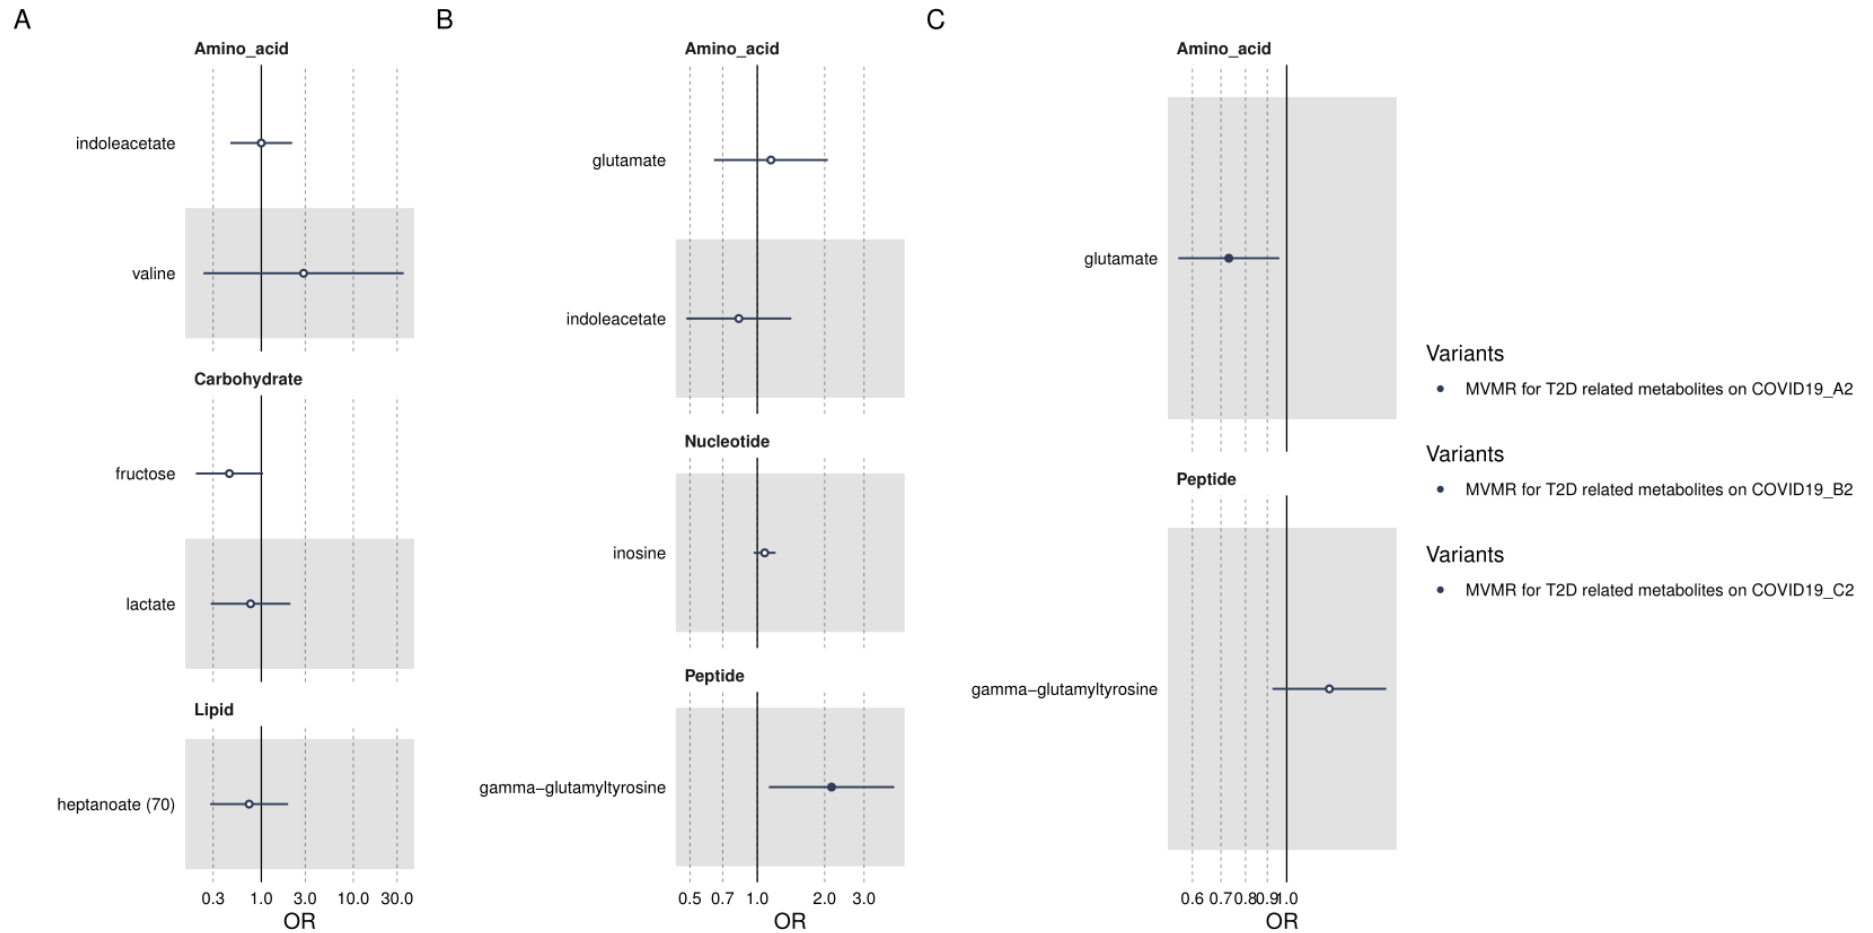

**Supplementary Figure S3.** Residual associations between T2D-associated human serum metabolites and COVID-19 phenotypes after adjusting for T2D. X-axis was the direct odds ratio of outcome per 1-log10 unit increase of the serum levels of metabolites conditioning on T2D. Solid dots indicate significant associations ( $P_{\text{MVMR}} < 0.05$ ) (A) Multivariable MR (MVMR) for T2D related metabolites on COVID-19 A2 phenotype, (B) Multivariable MR (MVMR) for T2D related metabolites on COVID-19 B2 phenotype, (C) Multivariable MR (MVMR) for T2D related metabolites on COVID-19 C2 phenotype.

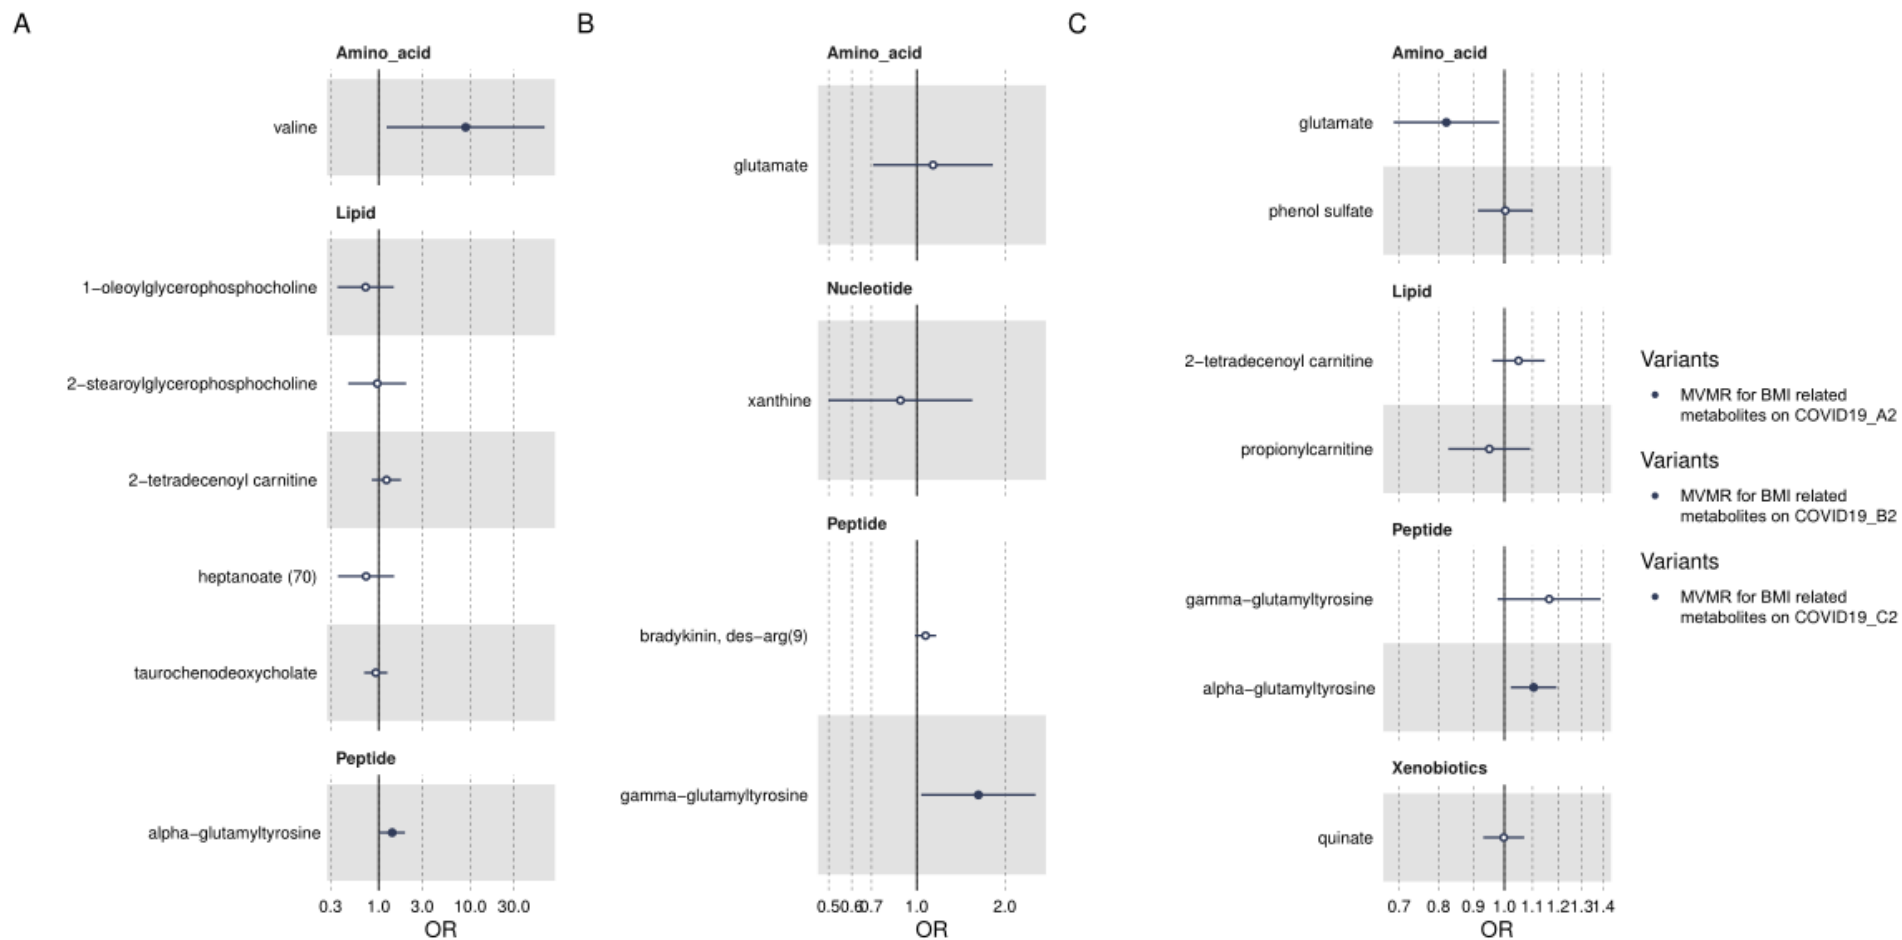

**Supplementary Figure S4.** Residual associations between BMI-associated human serum metabolites and COVID-19 phenotypes after adjusting for BMI. X-axis was the direct odds ratio of outcome per 1-log10 unit increase of the serum levels of metabolites conditioning on BMI. Solid dots indicate significant associations ( $P_{\text{MVMR}} < 0.05$ ) (A) Multivariable MR (MVMR) for BMI related metabolites on COVID-19 A2 phenotype, (B) Multivariable MR (MVMR) for BMI related metabolites on COVID-19 B2 phenotype, (C) Multivariable MR (MVMR) for BMI related metabolites on COVID-19 C2 phenotype.

**Supplementary Table S1.** GWAS summary data used in the current study.

| Traits                  | Traits Category   | Number of Participants Included in Original GWAS                                                                                                                                      | Population | Data Source                                     |
|-------------------------|-------------------|---------------------------------------------------------------------------------------------------------------------------------------------------------------------------------------|------------|-------------------------------------------------|
| Type 2 diabetes         | Exposure/Mediator | 74,124 (cases) vs. 824,006 (controls)                                                                                                                                                 | European   | DIAGRAM consortium [1]                          |
| Glycemic traits         | Exposure/Mediator | Individuals without diabetes;<br>fasting glucose (FG): 200,622<br>2h-glucose post-challenge (2hGlu): 63,396<br>glycated haemoglobin (HbA1c): 146,806<br>fasting insulin (FI): 151,013 | European   | MAGIC consortium [2]                            |
| Adiposity traits        | Exposure/Mediator | Body mass index (BMI): 322,154<br>Waist-hip-ratio (WHR): 212,248<br>Waist-hip-ratio adjusted for BMI (WHRadjBMI): 210,086                                                             | European   | GIANT consortium GWAS (Anthropometric 2015) [3] |
| Human serum metabolites | Exposure/Mediator | 7,824 healthy adult participants                                                                                                                                                      | European   | KORA + TwinsUK [4]                              |
| COVID19 (A2)            | Outcome           | Very severe respiratory confirmed COVID-19 (n = 8,779) vs. general population (n = 1,001,875)                                                                                         | Mixed      | COVID-19 Host Genetics Initiative [5]           |
| COVID19 (B2)            | Outcome           | Hospitalized COVID-19 (n = 24,274) vs. general population (n = 2,061,529)                                                                                                             | Mixed      |                                                 |
| COVID19 (C2)            | Outcome           | Laboratory-confirmed SARS-CoV-2 infection OR coding/physician-confirmed COVID-19 OR self-reported COVID-19 via questionnaire (n = 112,612) vs. general population (n = 2,474,079)     | Mixed      |                                                 |

[1] <http://diagram-consortium.org/>

[2] <https://magicinvestigators.org/>

[3] [https://portals.broadinstitute.org/collaboration/giant/index.php/GIANT\\_consortium\\_data\\_files](https://portals.broadinstitute.org/collaboration/giant/index.php/GIANT_consortium_data_files)

[4] <http://mips.helmholtz-muenchen.de/proj/GWAS/gwas/index.php>

[5] <https://www.covid19hg.org/>, round 6, released on June 15, 2021

**Supplementary Table S2.** Instrument strength for the 56 metabolites causally associated with COVID-19 outcomes at nominal significance ( $P_{IVW} < 0.05$ ).

| Metabolite_ID | Category     | Metabolite                            | Outcomes    |                |        |             |                |        |             |                |        |
|---------------|--------------|---------------------------------------|-------------|----------------|--------|-------------|----------------|--------|-------------|----------------|--------|
|               |              |                                       | COVID-19_A2 |                |        | COVID-19_B2 |                |        | COVID-19_C2 |                |        |
|               |              |                                       | Nsnp        | R <sup>2</sup> | F      | Nsnp        | R <sup>2</sup> | F      | Nsnp        | R <sup>2</sup> | F      |
| M00059        | Amino_acid   | histidine                             | 6           | 0.044          | 56.603 | 7           | 0.055          | 61.377 | 7           | 0.055          | 61.377 |
| M01284        | Amino_acid   | threonine                             | 19          | 0.080          | 25.935 | 19          | 0.080          | 25.935 | 19          | 0.080          | 25.935 |
| M01585        | Amino_acid   | N-acetylalanine                       | 22          | 0.066          | 23.466 | 23          | 0.069          | 23.500 | 23          | 0.069          | 23.500 |
| M01649        | Amino_acid   | valine                                | 4           | 0.015          | 28.829 | 6           | 0.041          | 52.554 | 6           | 0.041          | 52.554 |
| M22030        | Amino_acid   | 2-hydroxyisobutyrate                  | 19          | 0.082          | 27.603 | 19          | 0.082          | 27.603 | 19          | 0.082          | 27.603 |
| M27513        | Amino_acid   | indoleacetate                         | 20          | 0.085          | 31.625 | 20          | 0.085          | 31.625 | 20          | 0.085          | 31.625 |
| M32322        | Amino_acid   | glutamate                             | 3           | 0.013          | 24.243 | 3           | 0.013          | 24.243 | 3           | 0.013          | 24.243 |
| M32553        | Amino_acid   | phenol sulfate                        | 13          | 0.056          | 33.258 | 13          | 0.056          | 33.258 | 13          | 0.056          | 33.258 |
| M33441        | Amino_acid   | isobutyrylcarnitine                   | 10          | 0.074          | 58.383 | 10          | 0.074          | 58.383 | 10          | 0.074          | 58.383 |
| M33515        | Amino_acid   | hydroxytryptophan                     | 42          | 0.147          | 28.197 | 42          | 0.147          | 28.197 | 42          | 0.147          | 28.197 |
| M00527        | Carbohydrate | lactate                               | 12          | 0.054          | 35.144 | 13          | 0.057          | 34.414 | 13          | 0.057          | 34.414 |
| M00577        | Carbohydrate | fructose                              | 3           | 0.009          | 22.524 | 3           | 0.009          | 22.524 | 3           | 0.009          | 22.524 |
| M27738        | CVs*         | threonate                             | 18          | 0.097          | 43.478 | 18          | 0.097          | 43.478 | 18          | 0.097          | 43.478 |
| M01303        | Energy       | malate                                | 17          | 0.066          | 28.948 | 17          | 0.066          | 28.948 | 17          | 0.066          | 28.948 |
| M11438        | Energy       | phosphate                             | 4           | 0.039          | 75.079 | 4           | 0.039          | 75.079 | 5           | 0.042          | 64.604 |
| M33453        | Energy       | alpha-ketoglutarate                   | 18          | 0.096          | 31.729 | 18          | 0.096          | 31.729 | 18          | 0.096          | 31.729 |
| M00542        | Lipid        | 3-hydroxybutyrate (BHBA)              | 10          | 0.058          | 45.028 | 10          | 0.058          | 45.028 | 10          | 0.058          | 45.028 |
| M01105        | Lipid        | linoleate (18:2n6)                    | 17          | 0.051          | 23.236 | 17          | 0.051          | 23.236 | 17          | 0.051          | 23.236 |
| M01644        | Lipid        | heptanoate (7:0)                      | 33          | 0.123          | 30.314 | 33          | 0.123          | 30.314 | 34          | 0.126          | 30.241 |
| M15500        | Lipid        | carnitine                             | 160         | 0.620          | 70.733 | 160         | 0.623          | 71.137 | 160         | 0.623          | 71.137 |
| M15990        | Lipid        | glycerophosphorylcholine (GPC)        | 18          | 0.091          | 37.768 | 18          | 0.091          | 37.768 | 18          | 0.091          | 37.768 |
| M18494        | Lipid        | taurochenodeoxycholate                | 12          | 0.080          | 39.005 | 12          | 0.080          | 39.005 | 13          | 0.099          | 45.286 |
| M22189        | Lipid        | palmitoylcarnitine                    | 8           | 0.037          | 31.014 | 10          | 0.040          | 30.135 | 10          | 0.040          | 30.135 |
| M27531        | Lipid        | hyodeoxycholate                       | 15          | 0.121          | 48.733 | 16          | 0.125          | 47.683 | 16          | 0.125          | 47.683 |
| M32388        | Lipid        | dodecanedioate                        | 6           | 0.083          | 90.905 | 7           | 0.086          | 81.253 | 7           | 0.086          | 81.253 |
| M32452        | Lipid        | propionylcarnitine                    | 30          | 0.160          | 43.615 | 30          | 0.163          | 43.159 | 30          | 0.163          | 43.159 |
| M33230        | Lipid        | 1-palmitoleoylglycerophosphocholine   | 14          | 0.045          | 23.118 | 14          | 0.045          | 23.118 | 14          | 0.045          | 23.118 |
| M33447        | Lipid        | palmitoleate (16:1n7)                 | 9           | 0.053          | 37.510 | 9           | 0.053          | 37.510 | 9           | 0.053          | 37.510 |
| M33821        | Lipid        | 1-eicosatrienoylglycerophosphocholine | 19          | 0.091          | 38.545 | 19          | 0.091          | 38.545 | 20          | 0.094          | 37.911 |



|        |             |                                           |    |       |        |    |       |        |    |       |        |
|--------|-------------|-------------------------------------------|----|-------|--------|----|-------|--------|----|-------|--------|
| M33941 | Lipid       | decanoylcarnitine                         | 14 | 0.094 | 54.389 | 14 | 0.094 | 54.389 | 14 | 0.094 | 54.389 |
| M33957 | Lipid       | 1-heptadecanoylglycerophosphocholine      | 10 | 0.039 | 28.291 | 10 | 0.039 | 28.291 | 10 | 0.039 | 28.291 |
| M33960 | Lipid       | 1-oleoylglycerophosphocholine             | 14 | 0.050 | 27.838 | 16 | 0.056 | 27.197 | 16 | 0.056 | 27.197 |
| M33973 | Lipid       | epiandrosterone sulfate                   | 12 | 0.094 | 63.518 | 12 | 0.094 | 63.518 | 12 | 0.094 | 63.518 |
| M35160 | Lipid       | oleoylcarnitine                           | 11 | 0.046 | 29.432 | 12 | 0.046 | 29.432 | 12 | 0.046 | 29.432 |
| M35186 | Lipid       | 1-arachidonoylglycerophosphoethanolamine  | 21 | 0.105 | 38.950 | 21 | 0.105 | 38.950 | 21 | 0.105 | 38.950 |
| M35189 | Lipid       | nonanoylcarnitine                         | 13 | 0.139 | 77.361 | 13 | 0.139 | 77.361 | 13 | 0.139 | 77.361 |
| M35255 | Lipid       | 2-stearoylglycerophosphocholine           | 12 | 0.073 | 47.967 | 13 | 0.077 | 46.780 | 13 | 0.077 | 46.780 |
| M35472 | Lipid       | 2-tetradecenoyl carnitine                 | 19 | 0.110 | 42.901 | 19 | 0.110 | 42.901 | 19 | 0.110 | 42.901 |
| M35626 | Lipid       | 1-myristoylglycerophosphocholine          | 6  | 0.034 | 43.633 | 6  | 0.034 | 43.633 | 6  | 0.034 | 43.633 |
| M36754 | Lipid       | octadecanedioate                          | 9  | 0.060 | 48.755 | 9  | 0.060 | 48.755 | 9  | 0.060 | 48.755 |
| M36850 | Lipid       | tauroolithocholate 3-sulfate              | 10 | 0.063 | 43.693 | 10 | 0.063 | 43.693 | 10 | 0.063 | 43.693 |
| M37203 | Lipid       | 4-androsten-3beta,17beta-diol disulfate 2 | 18 | 0.066 | 28.933 | 18 | 0.066 | 28.933 | 18 | 0.066 | 28.933 |
| M01123 | Nucleotide  | inosine                                   | 10 | 0.113 | 33.599 | 10 | 0.113 | 33.599 | 10 | 0.113 | 33.599 |
| M03127 | Nucleotide  | hypoxanthine                              | 21 | 0.096 | 33.246 | 22 | 0.096 | 33.246 | 22 | 0.096 | 33.246 |
| M32739 | Nucleotide  | xanthine                                  | 7  | 0.067 | 47.883 | 7  | 0.067 | 47.883 | 7  | 0.067 | 47.883 |
| M02734 | Peptide     | gamma-glutamyltyrosine                    | 44 | 0.171 | 31.323 | 44 | 0.171 | 31.323 | 44 | 0.171 | 31.323 |
| M18357 | Peptide     | glycylvaline                              | 7  | 0.078 | 24.929 | 7  | 0.078 | 24.929 | 7  | 0.078 | 24.929 |
| M34420 | Peptide     | bradykinin, des-arg(9)                    | 18 | 0.172 | 51.190 | 19 | 0.177 | 50.100 | 19 | 0.177 | 50.100 |
| M36131 | Peptide     | alpha-glutamyltyrosine                    | 15 | 0.216 | 32.411 | 15 | 0.216 | 32.411 | 15 | 0.216 | 32.411 |
| M36738 | Peptide     | gamma-glutamylglutamate                   | 10 | 0.301 | 39.225 | 10 | 0.301 | 39.225 | 10 | 0.301 | 39.225 |
| M36756 | Peptide     | leucylleucine                             | 11 | 0.087 | 28.135 | 11 | 0.087 | 28.135 | 11 | 0.087 | 28.135 |
| M01515 | Xenobiotics | salicylate                                | 18 | 0.399 | 83.746 | 18 | 0.399 | 83.746 | 18 | 0.399 | 83.746 |
| M18335 | Xenobiotics | quinat                                    | 6  | 0.036 | 36.237 | 6  | 0.036 | 36.237 | 6  | 0.036 | 36.237 |
| M18392 | Xenobiotics | theobromine                               | 6  | 0.018 | 22.168 | 6  | 0.018 | 22.168 | 6  | 0.018 | 22.168 |
| M21151 | Xenobiotics | saccharin                                 | 10 | 0.168 | 46.870 | 10 | 0.168 | 46.870 | 10 | 0.168 | 46.870 |
| M36095 | Xenobiotics | thymol sulfate                            | 5  | 0.054 | 45.244 | 5  | 0.054 | 45.244 | 5  | 0.054 | 45.244 |

\*: cofactors and vitamins. Nsnp: number of valid genetic instruments after Steiger filtering.

The full list of the instrument strength for all the 302 metabolites is available at <https://doi.org/10.6084/m9.figshare.18737738>.

**Supplementary Table S3.** (a) Association between genetically predicted metabolic traits and COVID-19 phenotypes. (b) Assessment of the horizontal pleiotropic effects between metabolic traits and COVID-19 phenotypes.

| (a)       |                               |                          |                  |                          |                  |                              |                  |
|-----------|-------------------------------|--------------------------|------------------|--------------------------|------------------|------------------------------|------------------|
| Exposure  | MR Method                     | COVID-19 A2 (Severity)   |                  | COVID-19 B2 (Severity)   |                  | COVID-19 C2 (Susceptibility) |                  |
|           |                               | OR (95% CI)              | P                | OR (95% CI)              | P                | OR (95% CI)                  | P                |
| T2D       | Inverse variance weighted*    | 1.06 (1.00, 1.12)        | 0.055            | <b>1.05 (1.01, 1.10)</b> | <b>0.007</b>     | <b>1.02 (1.00, 1.04)</b>     | <b>0.039</b>     |
|           | Weighted median               | 1.00 (0.92, 1.10)        | 0.960            | 1.05 (0.99, 1.10)        | 0.094            | 1.02 (1.00, 1.04)            | 0.093            |
|           | MR Egger                      | 0.90 (0.79, 1.03)        | 0.117            | 0.94 (0.87, 1.03)        | 0.190            | 0.98 (0.94, 1.02)            | 0.296            |
|           | MR-PRESSO (outlier-corrected) | 1.05 (0.99, 1.10)        | 0.088            | <b>1.05 (1.02, 1.09)</b> | <b>0.003</b>     | <b>1.01 (1.00, 1.02)</b>     | <b>0.030</b>     |
| T2DadjBMI | Inverse variance weighted     | 1.03 (0.97, 1.08)        | 0.314            | 1.01 (0.98, 1.05)        | 0.408            | 1.00 (0.99, 1.01)            | 0.806            |
|           | Weighted median               | 0.97 (0.89, 1.06)        | 0.468            | 1.04 (0.99, 1.09)        | 0.148            | 1.01 (0.99, 1.03)            | 0.376            |
|           | MR Egger                      | 0.93 (0.82, 1.05)        | 0.247            | 0.99 (0.92, 1.07)        | 0.755            | 1.00 (0.97, 1.02)            | 0.768            |
|           | MR-PRESSO (outlier-corrected) | -†                       | -                | 1.01 (0.98, 1.04)        | 0.512            | -                            | -                |
| FG        | Inverse variance weighted     | 0.98 (0.70, 1.37)        | 0.911            | 1.03 (0.84, 1.26)        | 0.799            | 1.02 (0.92, 1.14)            | 0.660            |
|           | Weighted median               | 0.91 (0.64, 1.30)        | 0.598            | 1.01 (0.81, 1.25)        | 0.939            | 1.02 (0.93, 1.11)            | 0.685            |
|           | MR Egger                      | 0.71 (0.38, 1.34)        | 0.298            | 0.90 (0.61, 1.34)        | 0.616            | 1.00 (0.81, 1.23)            | 0.997            |
|           | MR-PRESSO (outlier-corrected) | 0.88 (0.68, 1.14)        | 0.332            | 0.96 (0.82, 1.11)        | 0.569            | 0.99 (0.94, 1.05)            | 0.808            |
| FI        | Inverse variance weighted     | 1.09 (0.74, 1.62)        | 0.662            | 1.14 (0.89, 1.48)        | 0.304            | 1.00 (0.89, 1.12)            | 0.951            |
|           | Weighted median               | 1.47 (0.77, 2.79)        | 0.243            | 1.18 (0.81, 1.73)        | 0.384            | 0.98 (0.85, 1.14)            | 0.830            |
|           | MR Egger                      | 0.87 (0.23, 3.33)        | 0.842            | 0.51 (0.24, 1.09)        | 0.089            | 0.78 (0.55, 1.10)            | 0.163            |
|           | MR-PRESSO (outlier-corrected) | -                        | -                | -                        | -                | 0.98 (0.88, 1.09)            | 0.667            |
| HbA1c     | Inverse variance weighted     | 1.37 (0.86, 2.20)        | 0.187            | 1.26 (0.95, 1.67)        | 0.108            | 1.08 (0.94, 1.23)            | 0.277            |
|           | Weighted median               | 1.29 (0.75, 2.24)        | 0.360            | 1.21 (0.88, 1.67)        | 0.242            | 1.01 (0.91, 1.14)            | 0.806            |
|           | MR Egger                      | 1.03 (0.43, 2.48)        | 0.943            | 1.27 (0.76, 2.13)        | 0.372            | 0.99 (0.77, 1.27)            | 0.944            |
|           | MR-PRESSO (outlier-corrected) | 1.35 (0.92, 1.99)        | 0.132            | <b>1.26 (1.04, 1.54)</b> | <b>0.022</b>     | 1.04 (0.96, 1.12)            | 0.336            |
| 2hGlu     | Inverse variance weighted     | 1.01 (0.70, 1.44)        | 0.960            | 1.06 (0.83, 1.36)        | 0.622            | 1.04 (0.87, 1.25)            | 0.634            |
|           | Weighted median               | 0.87 (0.69, 1.10)        | 0.255            | 0.98 (0.85, 1.12)        | 0.773            | 0.96 (0.91, 1.01)            | 0.112            |
|           | MR Egger                      | 0.51 (0.20, 1.28)        | 0.182            | 0.82 (0.41, 1.65)        | 0.588            | 0.79 (0.49, 1.28)            | 0.362            |
|           | MR-PRESSO (outlier-corrected) | 0.90 (0.77, 1.05)        | 0.215            | 0.97 (0.91, 1.04)        | 0.417            | 0.98 (0.94, 1.01)            | 0.170            |
| BMI       | Inverse variance weighted     | <b>1.70 (1.39, 2.07)</b> | <b>&lt;0.001</b> | <b>1.52 (1.33, 1.75)</b> | <b>&lt;0.001</b> | <b>1.14 (1.08, 1.20)</b>     | <b>&lt;0.001</b> |
|           | Weighted median               | <b>1.65 (1.24, 2.18)</b> | <b>&lt;0.001</b> | <b>1.58 (1.34, 1.87)</b> | <b>&lt;0.001</b> | <b>1.14 (1.08, 1.22)</b>     | <b>&lt;0.001</b> |
|           | MR Egger                      | 1.59 (0.88, 2.87)        | 0.127            | <b>1.61 (1.08, 2.41)</b> | <b>0.023</b>     | <b>1.22 (1.04, 1.43)</b>     | <b>0.019</b>     |
|           | MR-PRESSO (outlier-corrected) | -                        | -                | -                        | -                | <b>1.13 (1.07, 1.18)</b>     | <b>&lt;0.001</b> |
| WHR       | Inverse variance weighted     | 1.22 (0.85, 1.77)        | 0.283            | 1.22 (0.99, 1.50)        | 0.056            | 1.03 (0.96, 1.09)            | 0.417            |
|           | Weighted median               | 1.22 (0.78, 1.92)        | 0.382            | 1.11 (0.85, 1.45)        | 0.438            | 1.06 (0.97, 1.17)            | 0.206            |

| WHRadjBMI | MR Egger                      | 1.18 (0.22, 6.40)     | 0.850            | 0.78 (0.31, 1.98)   | 0.606        | 1.03 (0.76, 1.40) | 0.841        |
|-----------|-------------------------------|-----------------------|------------------|---------------------|--------------|-------------------|--------------|
|           | MR-PRESSO (outlier-corrected) | -                     | -                | -                   | -            | -                 | -            |
|           | Inverse variance weighted     | 1.03 (0.76, 1.38)     | 0.867            | 1.12 (0.96, 1.31)   | 0.144        | 1.02 (0.96, 1.09) | 0.441        |
|           | Weighted median               | 0.91 (0.64, 1.29)     | 0.591            | 1.14 (0.92, 1.40)   | 0.230        | 1.05 (0.97, 1.13) | 0.203        |
|           | MR Egger                      | 1.12 (0.28, 4.51)     | 0.870            | 0.81 (0.39, 1.66)   | 0.565        | 1.02 (0.76, 1.35) | 0.917        |
|           | MR-PRESSO (outlier-corrected) | 1.02 (0.81, 1.29)     | 0.868            | -                   | -            | -                 | -            |
| (b)       |                               |                       |                  |                     |              |                   |              |
| Exposure  | Outcome                       | MR-PRESSO Global Test |                  | MR-Egger Regression |              |                   | P            |
|           |                               | <i>RSSobs</i> *       | <i>P</i>         | Intercept           | SE           |                   |              |
| T2D       | COVID-19_A2                   | <b>246.200</b>        | <b>0.003</b>     | <b>0.011</b>        | <b>0.004</b> |                   | <b>0.009</b> |
| T2D       | COVID-19_B2                   | <b>366.210</b>        | <b>&lt;0.001</b> | <b>0.008</b>        | <b>0.003</b> |                   | <b>0.006</b> |
| T2D       | COVID-19_C2                   | <b>530.796</b>        | <b>&lt;0.001</b> | <b>0.003</b>        | <b>0.001</b> |                   | <b>0.029</b> |
| T2DadjBMI | COVID-19_A2                   | 171.183               | 0.059            | 0.009               | 0.005        |                   | 0.081        |
| T2DadjBMI | COVID-19_B2                   | 213.829               | 0.168            | 0.002               | 0.003        |                   | 0.456        |
| T2DadjBMI | COVID-19_C2                   | 139.884               | 0.556            | 0.000               | 0.001        |                   | 0.835        |
| FG        | COVID-19_A2                   | 130.984               | 0.611            | 0.009               | 0.007        |                   | 0.248        |
| FG        | COVID-19_B2                   | 160.440               | 0.224            | 0.003               | 0.005        |                   | 0.455        |
| FG        | COVID-19_C2                   | 286.596               | 0.111            | 0.001               | 0.002        |                   | 0.783        |
| FI        | COVID-19_A2                   | 32.702                | 0.764            | 0.004               | 0.011        |                   | 0.730        |
| FI        | COVID-19_B2                   | 42.055                | 0.366            | <b>0.014</b>        | <b>0.006</b> |                   | <b>0.034</b> |
| FI        | COVID-19_C2                   | <b>56.952</b>         | <b>0.031</b>     | 0.004               | 0.003        |                   | 0.146        |
| HbA1c     | COVID-19_A2                   | <b>142.832</b>        | <b>&lt;0.001</b> | 0.006               | 0.007        |                   | 0.450        |
| HbA1c     | COVID-19_B2                   | <b>166.754</b>        | <b>&lt;0.001</b> | 0.000               | 0.004        |                   | 0.971        |
| HbA1c     | COVID-19_C2                   | <b>258.324</b>        | <b>&lt;0.001</b> | 0.002               | 0.002        |                   | 0.434        |
| 2hGlu     | COVID-19_A2                   | <b>52.097</b>         | <b>&lt;0.001</b> | 0.053               | 0.034        |                   | 0.150        |
| 2hGlu     | COVID-19_B2                   | <b>83.566</b>         | <b>&lt;0.001</b> | 0.020               | 0.025        |                   | 0.450        |
| 2hGlu     | COVID-19_C2                   | <b>304.964</b>        | <b>&lt;0.001</b> | 0.021               | 0.018        |                   | 0.251        |
| BMI       | COVID-19_A2                   | 77.259                | 0.237            | 0.002               | 0.008        |                   | 0.818        |
| BMI       | COVID-19_B2                   | 110.062               | 0.067            | -0.002              | 0.006        |                   | 0.767        |
| BMI       | COVID-19_C2                   | 115.240               | 0.525            | -0.002              | 0.002        |                   | 0.407        |
| WHR       | COVID-19_A2                   | 42.835                | 0.072            | 0.001               | 0.022        |                   | 0.966        |
| WHR       | COVID-19_B2                   | 41.315                | 0.082            | 0.012               | 0.012        |                   | 0.342        |
| WHR       | COVID-19_C2                   | 25.158                | 0.679            | 0.000               | 0.004        |                   | 0.971        |
| WHRadjBMI | COVID-19_A2                   | 55.319                | 0.959            | -0.003              | 0.020        |                   | 0.895        |
| WHRadjBMI | COVID-19_B2                   | 45.307                | 0.161            | 0.010               | 0.011        |                   | 0.368        |
| WHRadjBMI | COVID-19_C2                   | 44.507                | 0.195            | 0.000               | 0.004        |                   | 0.956        |

In part (a), T2D: type 2 diabetes; BMI: body mass index; T2DadjBMI: T2D with BMI adjustment; FG: fasting glucose; FI: fasting insulin; HbA1c: glycated hemoglobin; 2hGlu: 2-hour plasma glucose after a 75-gram oral glucose tolerance test; WHR: waist-hip ratio; WHRadjBMI: WHR with BMI adjustment; MR-PRESSO: MR-Pleiotropy Residual Sum and Outlier; OR: odds ratio; CI: confidence interval. Associations of nominal significance are in **boldface** type. \*: Inverse variance weighted method with multiplicative random-effects

model was used as the primary method in the two-sample MR analysis. †: No outlier was detected. In part (b), \*: the  $RSSobs$  in MR-PRESSO global test is equivalent to the Cochran's Q statistic. Significant results are in **boldface** type, which suggest the **existence** of heterogeneity ( $P_{MR-PRESSO\ Global} < 0.05$ ) or horizontal pleiotropy ( $P_{MR-Egger\ intercept} < 0.05$ ).

**Supplementary Table S4.** Causal associations between human serum metabolites and COVID-19 phenotypes from metabolite-outcome screening.

| COVID-19 Outcome | Category           | Metabolite                             | IVW Method               |                  | Weighted Median Method   |              | MR-Egger Regression |              |
|------------------|--------------------|----------------------------------------|--------------------------|------------------|--------------------------|--------------|---------------------|--------------|
|                  |                    |                                        | OR (95% CI)              | P                | OR (95% CI)              | P            | Intercept           | P            |
| A2 (severity)    |                    |                                        |                          |                  |                          |              |                     |              |
|                  | Amino_acid         | histidine                              | 3.99 (1.11, 14.36)       | 0.034            | 4.74 (0.35, 64.29)       | 0.242        | -0.007              | 0.739        |
|                  | Amino_acid         | valine                                 | 3.52 (1.69, 7.33)        | 0.001            | 2.87 (0.08, 100.01)      | 0.561        | 0.022               | 0.756        |
|                  | Amino_acid         | indoleacetate                          | 0.67 (0.48, 0.94)        | 0.019            | 0.73 (0.38, 1.37)        | 0.323        | 0.004               | 0.651        |
|                  | Amino_acid         | hydroxytryptophan                      | 0.57 (0.34, 0.95)        | 0.033            | 0.63 (0.25, 1.57)        | 0.321        | 0.012               | 0.374        |
|                  | Carbohydrate       | lactate                                | 0.48 (0.24, 0.95)        | 0.035            | 0.78 (0.22, 2.73)        | 0.692        | 0.013               | 0.547        |
|                  | Carbohydrate       | fructose                               | 0.50 (0.33, 0.76)        | 0.001            | 0.44 (0.10, 1.86)        | 0.264        | -0.007              | 0.923        |
|                  | Energy             | malate                                 | 0.56 (0.34, 0.91)        | 0.020            | 0.54 (0.20, 1.47)        | 0.228        | 0.003               | 0.786        |
|                  | Energy             | alpha-ketoglutarate                    | 0.68 (0.48, 0.95)        | 0.026            | 0.71 (0.37, 1.37)        | 0.302        | 0.005               | 0.695        |
|                  | Lipid              | 3-hydroxybutyrate (BHBA)               | 1.25 (1.07, 1.45)        | 0.004            | 1.25 (1.00, 1.56)        | 0.052        | 0.007               | 0.589        |
|                  | Lipid              | heptanoate (7:0)                       | 0.45 (0.24, 0.85)        | 0.014            | 0.55 (0.20, 1.52)        | 0.249        | 0.018               | 0.167        |
|                  | Lipid              | taurochenodeoxycholate                 | 0.78 (0.61, 1.00)        | 0.049            | 0.71 (0.50, 1.01)        | 0.057        | 0.016               | 0.229        |
|                  | Lipid              | palmitoylcarnitine                     | 2.05 (1.20, 3.52)        | 0.009            | 1.92 (0.74, 5.00)        | 0.179        | -0.021              | 0.324        |
|                  | Lipid              | hyodeoxycholate                        | 1.24 (1.02, 1.51)        | 0.031            | 1.22 (0.91, 1.63)        | 0.177        | 0.003               | 0.774        |
|                  | Lipid              | palmitoleate (16:1n7)                  | 1.63 (1.05, 2.54)        | 0.030            | 1.55 (0.71, 3.39)        | 0.275        | -0.015              | 0.354        |
|                  | Lipid              | 1-eicosatrienoylglycerophosphocholine  | 0.53 (0.34, 0.82)        | 0.004            | 0.69 (0.37, 1.29)        | 0.246        | -0.028              | 0.073        |
|                  | Lipid              | 1-oleoylglycerophosphocholine          | 0.49 (0.27, 0.88)        | 0.016            | 0.64 (0.21, 1.93)        | 0.431        | -0.016              | 0.290        |
|                  | Lipid              | oleoylcarnitine                        | 1.49 (1.10, 2.02)        | 0.011            | 1.29 (0.58, 2.86)        | 0.526        | 0.008               | 0.598        |
|                  | Lipid              | nonanoylcarnitine                      | 1.48 (1.02, 2.15)        | 0.037            | 1.51 (1.07, 2.14)        | 0.02         | 0.014               | 0.384        |
|                  | <b>Lipid</b>       | <b>2-stearoylglycerophosphocholine</b> | <b>2.15 (1.48, 3.11)</b> | <b>&lt;0.001</b> | <b>2.42 (1.18, 4.95)</b> | <b>0.016</b> | <b>-0.016</b>       | <b>0.602</b> |
|                  | Lipid              | 2-tetradecenoyl carnitine              | 1.44 (1.08, 1.92)        | 0.013            | 1.62 (1.03, 2.55)        | 0.037        | 0.009               | 0.418        |
|                  | Peptide            | alpha-glutamyltyrosine                 | 1.32 (1.02, 1.71)        | 0.032            | 1.12 (0.71, 1.76)        | 0.622        | 0.024               | 0.284        |
|                  | Peptide            | leucylleucine                          | 0.61 (0.39, 0.94)        | 0.026            | 0.61 (0.32, 1.17)        | 0.139        | -0.010              | 0.648        |
|                  | Xenobiotics        | theobromine                            | 1.64 (1.06, 2.52)        | 0.026            | 2.08 (1.06, 4.07)        | 0.032        | -0.051              | 0.466        |
|                  | <b>Xenobiotics</b> | <b>thymol sulfate</b>                  | <b>1.32 (1.14, 1.53)</b> | <b>&lt;0.001</b> | <b>1.36 (0.98, 1.88)</b> | <b>0.064</b> | <b>-0.034</b>       | <b>0.457</b> |

## B2 (severity)

|                    |                                             |                          |                  |                          |              |               |              |
|--------------------|---------------------------------------------|--------------------------|------------------|--------------------------|--------------|---------------|--------------|
| Amino_acid         | 2-hydroxyisobutyrate                        | 1.47 (1.03, 2.09)        | 0.034            | 1.90 (1.13, 3.18)        | 0.015        | 0.013         | 0.142        |
| Amino_acid         | indoleacetate                               | 0.78 (0.65, 0.94)        | 0.011            | 0.74 (0.52, 1.07)        | 0.111        | -0.003        | 0.558        |
| <b>Amino_acid</b>  | <b>glutamate</b>                            | <b>1.39 (1.17, 1.65)</b> | <b>&lt;0.001</b> | <b>1.36 (0.55, 3.34)</b> | <b>0.502</b> | <b>-0.025</b> | <b>0.828</b> |
| Amino_acid         | isobutyrylcarnitine                         | 0.83 (0.72, 0.97)        | 0.017            | 0.84 (0.61, 1.14)        | 0.251        | 0.001         | 0.926        |
| CVs*               | threonate                                   | 0.85 (0.73, 0.99)        | 0.039            | 0.80 (0.62, 1.03)        | 0.079        | 0.004         | 0.484        |
| Energy             | phosphate                                   | 0.44 (0.23, 0.85)        | 0.014            | 0.35 (0.14, 0.86)        | 0.023        | 0.011         | 0.376        |
| Lipid              | carnitine                                   | 0.65 (0.45, 0.93)        | 0.018            | 0.51 (0.27, 0.96)        | 0.036        | 0.002         | 0.576        |
| Lipid              | palmitoylcarnitine                          | 1.37 (1.03, 1.82)        | 0.030            | 1.51 (0.92, 2.50)        | 0.104        | -0.004        | 0.722        |
| <b>Lipid</b>       | <b>decanoylcarnitine</b>                    | <b>1.32 (1.17, 1.50)</b> | <b>&lt;0.001</b> | <b>1.30 (1.01, 1.68)</b> | <b>0.043</b> | <b>0.006</b>  | <b>0.359</b> |
| <b>Lipid</b>       | <b>1-heptadecanoylglycerophosphocholine</b> | <b>1.34 (1.18, 1.52)</b> | <b>&lt;0.001</b> | <b>1.28 (0.86, 1.91)</b> | <b>0.219</b> | <b>-0.002</b> | <b>0.885</b> |
| Lipid              | epiandrosterone sulfate                     | 0.86 (0.75, 0.99)        | 0.041            | 0.77 (0.65, 0.92)        | 0.003        | 0.014         | 0.075        |
| Lipid              | 1-arachidonoylglycerophosphoethanolamine    | 1.26 (1.01, 1.57)        | 0.042            | 1.10 (0.71, 1.69)        | 0.682        | 0.004         | 0.543        |
| Lipid              | 1-myristoylglycerophosphocholine            | 0.67 (0.50, 0.91)        | 0.009            | 0.69 (0.43, 1.13)        | 0.139        | 0.003         | 0.813        |
| Lipid              | octadecanedioate                            | 0.81 (0.69, 0.96)        | 0.014            | 0.88 (0.58, 1.33)        | 0.537        | -0.009        | 0.434        |
| Lipid              | tauroolithocholate 3-sulfate                | 0.80 (0.70, 0.92)        | 0.002            | 0.83 (0.65, 1.05)        | 0.113        | 0.000         | 0.966        |
| Lipid              | 4-androsten-3beta,17beta-diol disulfate 2   | 1.23 (1.01, 1.49)        | 0.037            | 1.06 (0.77, 1.46)        | 0.735        | 0.002         | 0.811        |
| Nucleotide         | inosine                                     | 1.09 (1.01, 1.18)        | 0.023            | 1.09 (0.99, 1.21)        | 0.090        | -0.001        | 0.924        |
| Nucleotide         | hypoxanthine                                | 1.42 (1.08, 1.86)        | 0.012            | 1.23 (0.77, 1.96)        | 0.380        | 0.005         | 0.487        |
| Nucleotide         | xanthine                                    | 0.67 (0.47, 0.96)        | 0.03             | 0.61 (0.31, 1.20)        | 0.154        | -0.012        | 0.533        |
| <b>Peptide</b>     | <b>gamma-glutamyltyrosine</b>               | <b>1.74 (1.29, 2.35)</b> | <b>&lt;0.001</b> | <b>1.70 (1.04, 2.77)</b> | <b>0.033</b> | <b>0.005</b>  | <b>0.388</b> |
| <b>Peptide</b>     | <b>bradykinin, des-arg(9)</b>               | <b>1.09 (1.05, 1.13)</b> | <b>&lt;0.001</b> | <b>1.09 (1.00, 1.20)</b> | <b>0.056</b> | <b>0.000</b>  | <b>0.949</b> |
| Peptide            | gamma-glutamylglutamate                     | 1.13 (1.04, 1.24)        | 0.006            | 1.16 (0.92, 1.48)        | 0.215        | -0.001        | 0.932        |
| Xenobiotics        | salicylate                                  | 0.97 (0.96, 0.99)        | 0.009            | 0.97 (0.94, 1.00)        | 0.070        | 0.001         | 0.815        |
| <b>Xenobiotics</b> | <b>thymol sulfate</b>                       | <b>1.20 (1.10, 1.30)</b> | <b>&lt;0.001</b> | <b>1.25 (1.05, 1.49)</b> | <b>0.014</b> | <b>0.002</b>  | <b>0.922</b> |

## C2 (susceptibility)

|            |                                |                   |       |                   |       |        |       |
|------------|--------------------------------|-------------------|-------|-------------------|-------|--------|-------|
| Amino_acid | threonine                      | 0.82 (0.72, 0.93) | 0.003 | 0.76 (0.61, 0.95) | 0.017 | -0.004 | 0.396 |
| Amino_acid | N-acetylalanine                | 1.26 (1.03, 1.53) | 0.024 | 1.38 (0.96, 1.99) | 0.080 | -0.038 | 0.072 |
| Amino_acid | glutamate                      | 0.88 (0.81, 0.95) | 0.001 | 0.90 (0.65, 1.25) | 0.537 | 0.001  | 0.979 |
| Amino_acid | phenol sulfate                 | 1.08 (1.01, 1.15) | 0.021 | 1.04 (0.93, 1.16) | 0.534 | 0.000  | 0.992 |
| CVs        | threonate                      | 0.92 (0.86, 0.98) | 0.007 | 0.93 (0.84, 1.04) | 0.224 | 0.001  | 0.638 |
| Lipid      | linoleate (18:2n6)             | 1.25 (1.01, 1.55) | 0.042 | 1.24 (0.95, 1.61) | 0.107 | -0.002 | 0.675 |
| Lipid      | glycerophosphorylcholine (GPC) | 0.95 (0.90, 0.99) | 0.014 | 0.94 (0.86, 1.04) | 0.237 | 0.000  | 0.817 |
| Lipid      | dodecanedioate                 | 0.89 (0.80, 1.00) | 0.043 | 0.90 (0.78, 1.05) | 0.179 | 0.007  | 0.380 |

|             |                                          |                   |       |                   |       |        |       |
|-------------|------------------------------------------|-------------------|-------|-------------------|-------|--------|-------|
| Lipid       | propionylcarnitine                       | 0.90 (0.81, 0.99) | 0.036 | 0.88 (0.74, 1.04) | 0.139 | 0.001  | 0.497 |
| Lipid       | 1-palmitoleoylglycerophosphocholine      | 1.20 (1.02, 1.40) | 0.025 | 1.21 (0.97, 1.50) | 0.084 | -0.003 | 0.586 |
| Lipid       | decanoylcarnitine                        | 1.05 (1.01, 1.09) | 0.018 | 1.03 (0.93, 1.14) | 0.549 | 0.001  | 0.642 |
| Lipid       | 1-arachidonoylglycerophosphoethanolamine | 1.16 (1.02, 1.32) | 0.024 | 1.07 (0.90, 1.27) | 0.445 | 0.002  | 0.437 |
| Lipid       | 2-tetradecenoyl carnitine                | 1.06 (1.01, 1.11) | 0.031 | 1.06 (0.96, 1.16) | 0.231 | 0.002  | 0.360 |
| Peptide     | gamma-glutamyltyrosine                   | 1.23 (1.08, 1.39) | 0.001 | 1.27 (1.05, 1.53) | 0.012 | 0.001  | 0.818 |
| Peptide     | glycylvaline                             | 1.07 (1.01, 1.13) | 0.026 | 1.05 (0.94, 1.17) | 0.388 | -0.002 | 0.827 |
| Xenobiotics | quinat                                   | 0.96 (0.92, 1.00) | 0.037 | 0.95 (0.87, 1.04) | 0.239 | 0.002  | 0.723 |
| Xenobiotics | saccharin                                | 0.96 (0.94, 0.99) | 0.001 | 0.96 (0.91, 1.00) | 0.075 | 0.001  | 0.856 |
| Xenobiotics | thymol sulfate                           | 1.06 (1.00, 1.11) | 0.046 | 1.07 (1.00, 1.15) | 0.059 | 0.005  | 0.618 |

\*: cofactors and vitamins. IVW, inverse variance weighted method with multiplicative random-effects. Associations that remained significant after multiple testing correction are in **boldface** type. Associations significant in sensitivity analysis ( $P_{\text{weighted-median}} < 0.05$ ) are further in *italic* type.

**Supplementary Table S5.** Assessment of the causal relationship between T2D and metabolites (T2D as exposure).

| Category            | Metabolite                            | Nsnp      | IVW Method                |             | Weighted Median Method  |             | MR-Egger Regression |              |
|---------------------|---------------------------------------|-----------|---------------------------|-------------|-------------------------|-------------|---------------------|--------------|
|                     |                                       |           | Beta (95% CI)             | P           | Beta (95% CI)           | P           | Intercept           | P            |
| Amino_acid          | histidine                             | 82        | -0.00(-0.01,0.00)         | 0.77        | 0.00(-0.01,0.01)        | 0.78        | -0.001              | 0.048        |
| <b>Amino_acid</b>   | <b>threonine</b>                      | <b>81</b> | <b>0.01(0.00,0.02)</b>    | <b>0.01</b> | 0.01(-0.00,0.03)        | 0.08        | -0.002              | 0.009        |
| Amino_acid          | N-acetylalanine                       | 83        | 0.00(-0.00,0.01)          | 0.43        | 0.00(-0.00,0.01)        | 0.31        | 0.001               | 0.238        |
| <b>Amino_acid</b>   | <b>valine</b>                         | <b>83</b> | <b>0.01(0.00,0.01)</b>    | <b>0.02</b> | <b>0.01(0.00,0.02)</b>  | <b>0.04</b> | <b>0.000</b>        | <b>0.526</b> |
| Amino_acid          | 2-hydroxyisobutyrate                  | 83        | 0.00(-0.01,0.01)          | 0.74        | 0.00(-0.01,0.02)        | 0.74        | -0.001              | 0.185        |
| <b>Amino_acid</b>   | <b>indoleacetate</b>                  | <b>82</b> | <b>0.02(0.00,0.03)</b>    | <b>0.04</b> | 0.01(-0.01,0.03)        | 0.55        | 0.002               | 0.207        |
| <b>Amino_acid</b>   | <b>glutamate</b>                      | <b>83</b> | <b>0.03(0.01,0.04)</b>    | <b>0.00</b> | <b>0.03(0.01,0.05)</b>  | <b>0.01</b> | <b>0.000</b>        | <b>0.864</b> |
| Amino_acid          | phenol sulfate                        | 83        | 0.00(-0.02,0.02)          | 0.99        | 0.01(-0.02,0.05)        | 0.34        | -0.001              | 0.562        |
| Amino_acid          | isobutyrylcarnitine                   | 83        | -0.00(-0.02,0.01)         | 0.76        | 0.00(-0.02,0.02)        | 0.99        | 0.000               | 0.84         |
| Amino_acid          | hydroxytryptophan                     | 83        | 0.00(-0.01,0.01)          | 0.45        | 0.00(-0.01,0.02)        | 0.60        | 0.002               | 0.011        |
| <b>Carbohydrate</b> | <b>lactate</b>                        | <b>82</b> | <b>0.01(0.00,0.02)</b>    | <b>0.03</b> | <b>0.02(0.01,0.04)</b>  | <b>0.00</b> | <b>0.000</b>        | <b>0.875</b> |
| <b>Carbohydrate</b> | <b>fructose</b>                       | <b>83</b> | <b>0.02(0.01,0.04)</b>    | <b>0.00</b> | <b>0.04(0.01,0.06)</b>  | <b>0.00</b> | <b>-0.001</b>       | <b>0.509</b> |
| CVs*                | threonate                             | 83        | -0.01(-0.03,0.01)         | 0.20        | -0.00(-0.03,0.02)       | 0.69        | 0.001               | 0.594        |
| Energy              | malate                                | 82        | 0.00(-0.01,0.02)          | 0.42        | 0.00(-0.01,0.02)        | 0.62        | 0.001               | 0.289        |
| Energy              | phosphate                             | 83        | -0.00(-0.01,0.00)         | 0.36        | -0.00(-0.01,0.01)       | 0.72        | 0.000               | 0.444        |
| Energy              | alpha-ketoglutarate                   | 82        | 0.01(-0.01,0.02)          | 0.39        | 0.01(-0.01,0.03)        | 0.36        | 0.001               | 0.351        |
| Lipid               | 3-hydroxybutyrate (BHBA)              | 82        | -0.00(-0.04,0.03)         | 0.81        | -0.01(-0.05,0.04)       | 0.78        | -0.001              | 0.67         |
| Lipid               | linoleate (18:2n6)                    | 83        | -0.00(-0.02,0.01)         | 0.39        | -0.02(-0.03,0.00)       | 0.06        | 0.000               | 0.827        |
| <b>Lipid</b>        | <b>heptanoate (7:0)</b>               | <b>83</b> | <b>-0.01(-0.02,-0.00)</b> | <b>0.00</b> | -0.01(-0.02,0.01)       | 0.35        | 0.001               | 0.442        |
| Lipid               | carnitine                             | 81        | 0.00(-0.00,0.01)          | 0.57        | 0.00(-0.00,0.01)        | 0.37        | 0.000               | 0.745        |
| Lipid               | glycerophosphorylcholine (GPC)        | 83        | -0.01(-0.02,0.00)         | 0.18        | -0.01(-0.03,0.01)       | 0.41        | -0.001              | 0.557        |
| <b>Lipid</b>        | <b>taurochenodeoxycholate</b>         | <b>83</b> | <b>0.02(-0.01,0.05)</b>   | <b>0.15</b> | <b>0.03(-0.01,0.08)</b> | <b>0.17</b> | <b>0.003</b>        | <b>0.278</b> |
| Lipid               | palmitoylcarnitine                    | 83        | 0.01(-0.01,0.02)          | 0.35        | 0.00(-0.02,0.02)        | 0.85        | 0.002               | 0.13         |
| Lipid               | hyodeoxycholate                       | 83        | 0.02(-0.01,0.04)          | 0.24        | 0.02(-0.03,0.06)        | 0.49        | -0.002              | 0.521        |
| Lipid               | dodecanedioate                        | 83        | 0.00(-0.01,0.02)          | 0.61        | 0.01(-0.01,0.04)        | 0.30        | -0.001              | 0.341        |
| Lipid               | propionylcarnitine                    | 81        | 0.01(-0.00,0.02)          | 0.22        | 0.01(-0.01,0.02)        | 0.49        | 0.001               | 0.089        |
| Lipid               | 1-palmitoleoylglycerophosphocholine   | 83        | -0.01(-0.02,0.01)         | 0.41        | -0.00(-0.03,0.02)       | 0.68        | 0.001               | 0.457        |
| Lipid               | palmitoleate (16:1n7)                 | 83        | -0.01(-0.03,0.00)         | 0.08        | -0.00(-0.03,0.02)       | 0.72        | 0.000               | 0.811        |
| Lipid               | 1-eicosatrienoylglycerophosphocholine | 83        | -0.00(-0.02,0.01)         | 0.74        | 0.01(-0.01,0.03)        | 0.50        | 0.000               | 0.946        |
| Lipid               | decanoylcarnitine                     | 83        | -0.01(-0.03,0.01)         | 0.46        | 0.00(-0.02,0.03)        | 0.81        | -0.002              | 0.225        |

|                   |                                           |           |                           |             |                        |             |              |              |
|-------------------|-------------------------------------------|-----------|---------------------------|-------------|------------------------|-------------|--------------|--------------|
| Lipid             | 1-heptadecanoylglycerophosphocholine      | 83        | -0.01(-0.03,0.01)         | 0.47        | -0.00(-0.03,0.02)      | 0.74        | -0.001       | 0.446        |
| <b>Lipid</b>      | <b>1-oleoylglycerophosphocholine</b>      | <b>83</b> | <b>-0.01(-0.03,-0.00)</b> | <b>0.03</b> | -0.01(-0.03,0.00)      | 0.15        | 0.000        | 0.909        |
| Lipid             | epiandrosterone sulfate                   | 82        | 0.02(-0.01,0.04)          | 0.20        | -0.01(-0.05,0.03)      | 0.59        | 0.004        | 0.097        |
| Lipid             | oleoylcarnitine                           | 82        | 0.00(-0.02,0.02)          | 0.96        | -0.01(-0.03,0.02)      | 0.68        | 0.001        | 0.468        |
| Lipid             | 1-arachidonoylglycerophosphoethanolamine  | 82        | -0.01(-0.02,0.01)         | 0.33        | 0.00(-0.02,0.02)       | 0.83        | -0.001       | 0.586        |
| Lipid             | nonanoylcarnitine                         | 83        | 0.01(-0.00,0.03)          | 0.14        | 0.03(-0.00,0.06)       | 0.07        | -0.002       | 0.339        |
| Lipid             | 2-stearoylglycerophosphocholine           | 82        | -0.01(-0.03,0.01)         | 0.22        | -0.01(-0.03,0.01)      | 0.38        | 0.000        | 0.929        |
| Lipid             | 2-tetradecenoyl carnitine                 | 83        | -0.01(-0.03,0.02)         | 0.59        | -0.01(-0.04,0.02)      | 0.70        | 0.002        | 0.387        |
| Lipid             | 1-myristoylglycerophosphocholine          | 82        | -0.01(-0.02,0.01)         | 0.50        | 0.01(-0.02,0.03)       | 0.50        | 0.000        | 0.745        |
| Lipid             | octadecanedioate                          | 83        | -0.00(-0.02,0.01)         | 0.90        | -0.00(-0.03,0.02)      | 0.88        | 0.000        | 0.852        |
| Lipid             | tauroolithocholate 3-sulfate              | 81        | 0.00(-0.02,0.03)          | 0.79        | -0.00(-0.05,0.04)      | 0.84        | 0.004        | 0.121        |
| Lipid             | 4-androsten-3beta,17beta-diol disulfate 2 | 83        | 0.01(-0.01,0.03)          | 0.25        | -0.01(-0.03,0.02)      | 0.63        | 0.003        | 0.051        |
| <b>Nucleotide</b> | <b>inosine</b>                            | <b>83</b> | <b>-0.05(-0.09,-0.01)</b> | <b>0.01</b> | -0.06(-0.12,0.01)      | 0.08        | 0.003        | 0.369        |
| Nucleotide        | hypoxanthine                              | 83        | 0.00(-0.01,0.02)          | 0.60        | 0.00(-0.01,0.02)       | 0.64        | 0.000        | 0.701        |
| Nucleotide        | xanthine                                  | 83        | -0.00(-0.01,0.01)         | 0.81        | -0.01(-0.02,0.01)      | 0.59        | 0.000        | 0.778        |
| <b>Peptide</b>    | <b>gamma-glutamyltyrosine</b>             | <b>83</b> | <b>0.02(0.01,0.02)</b>    | <b>0.00</b> | <b>0.02(0.01,0.03)</b> | <b>0.00</b> | <b>0.001</b> | <b>0.145</b> |
| Peptide           | glycylvaline                              | 82        | 0.02(-0.02,0.05)          | 0.30        | 0.03(-0.02,0.08)       | 0.26        | 0.000        | 0.866        |
| Peptide           | bradykinin, des-arg(9)                    | 82        | -0.00(-0.04,0.04)         | 0.90        | -0.02(-0.08,0.04)      | 0.56        | 0.003        | 0.354        |
| Peptide           | alpha-glutamyltyrosine                    | 79        | -0.01(-0.03,0.01)         | 0.46        | 0.00(-0.04,0.04)       | 0.93        | -0.002       | 0.393        |
| Peptide           | gamma-glutamylglutamate                   | 81        | 0.02(-0.01,0.05)          | 0.17        | 0.01(-0.04,0.05)       | 0.78        | 0.001        | 0.647        |
| Peptide           | leucylleucine                             | 83        | -0.00(-0.02,0.01)         | 0.80        | -0.01(-0.04,0.02)      | 0.52        | -0.001       | 0.579        |
| Xenobiotics       | salicylate                                | 82        | 0.01(-0.06,0.08)          | 0.80        | 0.05(-0.05,0.16)       | 0.33        | -0.011       | 0.081        |
| Xenobiotics       | quinine                                   | 83        | 0.02(-0.01,0.06)          | 0.19        | 0.03(-0.02,0.08)       | 0.28        | 0.002        | 0.56         |
| Xenobiotics       | theobromine                               | 83        | -0.00(-0.03,0.02)         | 0.80        | -0.00(-0.04,0.04)      | 0.98        | -0.001       | 0.687        |
| Xenobiotics       | saccharin                                 | 80        | -0.00(-0.05,0.05)         | 0.94        | -0.02(-0.09,0.05)      | 0.52        | 0.001        | 0.816        |
| Xenobiotics       | thymol sulfate                            | 83        | -0.01(-0.06,0.03)         | 0.50        | -0.01(-0.08,0.07)      | 0.81        | 0.001        | 0.89         |

\*: cofactors and vitamins. Nsnp: number of valid genetic instruments after Steiger filtering. IVW, inverse variance weighted method with multiplicative random-effects. Associations of nominal significance in primary analysis ( $P_{IVW} < 0.05$ ) are in **boldface** type. Associations that remained significant in sensitivity analysis ( $P_{\text{weighted-median}} < 0.05$ ) are further in *italic* type.



**Supplementary Table S6.** Direct effects of T2D-associated metabolites on COVID-19 phenotypes conditioning on T2D.

| COVID-19 Outcome | Category          | Metabolites                   | Nsnp      | MVMR IVW Method        |              |
|------------------|-------------------|-------------------------------|-----------|------------------------|--------------|
|                  |                   |                               |           | OR (95% CI)            | P            |
| A2               | Amino_acid        | indoleacetate                 | 4         | 1.00(0.46,2.16)        | 0.995        |
|                  | Amino_acid        | valine                        | 2         | 2.88(0.23,35.32)       | 0.408        |
|                  | Carbohydrate      | fructose                      | 2         | 0.45(0.19,1.04)        | 0.063        |
|                  | Carbohydrate      | lactate                       | 6         | 0.76(0.28,2.07)        | 0.597        |
|                  | Lipid             | heptanoate (7:0)              | 12        | 0.74(0.28,1.95)        | 0.540        |
| B2               | Amino_acid        | glutamate                     | 2         | 1.15(0.64,2.07)        | 0.641        |
|                  | Amino_acid        | indoleacetate                 | 4         | 0.83(0.48,1.42)        | 0.489        |
|                  | Nucleotide        | inosine                       | 3         | 1.08(0.96,1.21)        | 0.186        |
|                  | <b>Peptide</b>    | <b>gamma-glutamyltyrosine</b> | <b>14</b> | <b>2.15(1.13,4.09)</b> | <b>0.020</b> |
| C2               | <b>Amino_acid</b> | <b>glutamate</b>              | <b>2</b>  | <b>0.73(0.56,0.96)</b> | <b>0.025</b> |
|                  | Peptide           | gamma-glutamyltyrosine        | 14        | 1.26(0.93,1.71)        | 0.142        |

Associations of nominal significance in primary analysis ( $P_{MV-IVW} < 0.05$ ) are in **boldface** type.

**Supplementary Table S7.** Assessment of the causal relationship between BMI and metabolites (BMI as exposure).

| Category          | Metabolite                            | NsnP      | IVW Method                  |              | Weighted Median Method     |              | MR-Egger Regression |              |
|-------------------|---------------------------------------|-----------|-----------------------------|--------------|----------------------------|--------------|---------------------|--------------|
|                   |                                       |           | Beta (95% CI)               | P            | Beta (95% CI)              | P            | Intercept           | P            |
| Amino_acid        | histidine                             | 67        | 0.00 (-0.01, 0.01)          | 0.624        | 0.00 (-0.01, 0.02)         | 0.676        | 0.000               | 0.380        |
| Amino_acid        | threonine                             | 66        | -0.01 (-0.04, 0.01)         | 0.276        | -0.01 (-0.04, 0.03)        | 0.744        | 0.000               | 0.748        |
| Amino_acid        | N-acetylalanine                       | 67        | 0.01 (-0.01, 0.02)          | 0.455        | 0.01 (-0.01, 0.03)         | 0.418        | -0.001              | 0.484        |
| <b>Amino_acid</b> | <b>valine</b>                         | <b>67</b> | <b>0.01 (0.00, 0.03)</b>    | <b>0.015</b> | <b>0.01 (-0.01, 0.03)</b>  | <b>0.331</b> | <b>0.001</b>        | <b>0.137</b> |
| Amino_acid        | 2-hydroxyisobutyrate                  | 66        | 0.00 (-0.03, 0.02)          | 0.917        | -0.01 (-0.05, 0.03)        | 0.540        | 0.002               | 0.093        |
| Amino_acid        | indoleacetate                         | 66        | 0.01 (-0.02, 0.04)          | 0.477        | 0.02 (-0.03, 0.07)         | 0.478        | -0.001              | 0.263        |
| <b>Amino_acid</b> | <b>glutamate</b>                      | <b>67</b> | <b>0.05 (0.02, 0.09)</b>    | <b>0.005</b> | <b>0.04 (-0.01, 0.10)</b>  | <b>0.088</b> | <b>0.001</b>        | <b>0.576</b> |
| <b>Amino_acid</b> | <b>phenol sulfate</b>                 | <b>67</b> | <b>-0.06 (-0.11, -0.01)</b> | <b>0.017</b> | <b>-0.03 (-0.11, 0.04)</b> | <b>0.402</b> | <b>0.001</b>        | <b>0.586</b> |
| Amino_acid        | isobutyrylcarnitine                   | 67        | 0.02 (-0.01, 0.06)          | 0.207        | 0.03 (-0.03, 0.08)         | 0.358        | -0.001              | 0.504        |
| Amino_acid        | hydroxytryptophan                     | 67        | 0.01 (-0.01, 0.03)          | 0.224        | 0.01 (-0.02, 0.04)         | 0.455        | 0.001               | 0.513        |
| Carbohydrate      | lactate                               | 67        | 0.02 (-0.01, 0.04)          | 0.153        | 0.00 (-0.03, 0.04)         | 0.786        | 0.001               | 0.318        |
| Carbohydrate      | fructose                              | 67        | 0.01 (-0.02, 0.05)          | 0.468        | 0.01 (-0.05, 0.07)         | 0.737        | -0.001              | 0.440        |
| CVs*              | threonate                             | 67        | 0.00 (-0.03, 0.03)          | 0.896        | 0.01 (-0.04, 0.07)         | 0.702        | -0.001              | 0.394        |
| Energy            | malate                                | 67        | 0.00 (-0.03, 0.02)          | 0.952        | 0.01 (-0.03, 0.05)         | 0.564        | 0.001               | 0.505        |
| Energy            | phosphate                             | 67        | -0.01 (-0.02, 0.00)         | 0.150        | -0.01 (-0.03, 0.01)        | 0.287        | 0.000               | 0.907        |
| Energy            | alpha-ketoglutarate                   | 67        | 0.02 (-0.02, 0.05)          | 0.385        | 0.02 (-0.03, 0.08)         | 0.428        | 0.000               | 0.920        |
| Lipid             | 3-hydroxybutyrate (BHBA)              | 66        | -0.02 (-0.1, 0.06)          | 0.574        | -0.04 (-0.14, 0.07)        | 0.508        | -0.001              | 0.767        |
| Lipid             | linoleate (18:2n6)                    | 67        | 0.00 (-0.03, 0.02)          | 0.763        | -0.01 (-0.05, 0.02)        | 0.449        | 0.000               | 0.881        |
| <b>Lipid</b>      | <b>heptanoate (7:0)</b>               | <b>66</b> | <b>-0.03 (-0.05, -0.01)</b> | <b>0.001</b> | <b>-0.03 (-0.05, 0.00)</b> | <b>0.096</b> | <b>0.001</b>        | <b>0.542</b> |
| Lipid             | carnitine                             | 67        | 0.01 (0.00, 0.02)           | 0.077        | 0.01 (-0.01, 0.02)         | 0.552        | 0.001               | 0.014        |
| Lipid             | glycerophosphorylcholine (GPC)        | 67        | -0.02 (-0.05, 0.01)         | 0.195        | -0.03 (-0.08, 0.02)        | 0.205        | 0.000               | 0.876        |
| <b>Lipid</b>      | <b>taurochenodeoxycholate</b>         | <b>66</b> | <b>0.08 (0.02, 0.14)</b>    | <b>0.012</b> | <b>0.10 (0.00, 0.20)</b>   | <b>0.044</b> | <b>0.000</b>        | <b>0.891</b> |
| Lipid             | palmitoylcarnitine                    | 67        | -0.02 (-0.05, 0.01)         | 0.190        | 0.00 (-0.05, 0.05)         | 0.924        | 0.001               | 0.472        |
| Lipid             | hyodeoxycholate                       | 66        | 0.03 (-0.04, 0.10)          | 0.412        | 0.04 (-0.07, 0.15)         | 0.486        | -0.001              | 0.761        |
| Lipid             | dodecanedioate                        | 67        | -0.02 (-0.06, 0.02)         | 0.224        | -0.02 (-0.08, 0.04)        | 0.430        | 0.001               | 0.443        |
| <b>Lipid</b>      | <b>propionylcarnitine</b>             | <b>66</b> | <b>0.03 (0.00, 0.05)</b>    | <b>0.032</b> | <b>0.03 (0.00, 0.06)</b>   | <b>0.071</b> | <b>-0.001</b>       | <b>0.427</b> |
| Lipid             | 1-palmitoleoylglycerophosphocholine   | 67        | -0.02 (-0.06, 0.01)         | 0.232        | -0.02 (-0.07, 0.03)        | 0.501        | -0.001              | 0.679        |
| Lipid             | palmitoleate (16:1n7)                 | 66        | 0.01 (-0.03, 0.05)          | 0.617        | 0.01 (-0.04, 0.07)         | 0.694        | 0.000               | 0.842        |
| Lipid             | 1-eicosatrienoylglycerophosphocholine | 67        | -0.02 (-0.06, 0.01)         | 0.234        | -0.03 (-0.08, 0.02)        | 0.287        | 0.001               | 0.472        |
| Lipid             | decanoylcarnitine                     | 65        | -0.03 (-0.07, 0.01)         | 0.172        | -0.01 (-0.07, 0.05)        | 0.821        | -0.003              | 0.086        |

|                    |                                           |           |                                 |                         |                                 |                     |                      |                     |
|--------------------|-------------------------------------------|-----------|---------------------------------|-------------------------|---------------------------------|---------------------|----------------------|---------------------|
| Lipid              | 1-heptadecanoylglycerophosphocholine      | 67        | -0.04 (-0.08, 0.00)             | 0.071                   | 0.00 (-0.06, 0.06)              | 0.956               | -0.002               | 0.156               |
| <b>Lipid</b>       | <b>1-oleoylglycerophosphocholine</b>      | <b>66</b> | <b>-0.03 (-0.06, -0.01)</b>     | <b>0.014</b>            | <b>-0.03 (-0.07, 0.01)</b>      | <b>0.149</b>        | <b>-0.002</b>        | <b>0.151</b>        |
| Lipid              | epiandrosterone sulfate                   | 67        | -0.02 (-0.07, 0.03)             | 0.461                   | -0.02 (-0.11, 0.07)             | 0.654               | 0.001                | 0.645               |
| Lipid              | oleoylcarnitine                           | 67        | -0.02 (-0.06, 0.02)             | 0.251                   | -0.01 (-0.07, 0.04)             | 0.647               | 0.000                | 0.874               |
| Lipid              | 1-arachidonoylglycerophosphoethanolamine  | 67        | -0.02 (-0.05, 0.00)             | 0.087                   | -0.02 (-0.05, 0.02)             | 0.455               | 0.001                | 0.220               |
| Lipid              | nonanoylcarnitine                         | 67        | -0.01 (-0.06, 0.04)             | 0.697                   | -0.01 (-0.08, 0.06)             | 0.878               | -0.002               | 0.317               |
| <b>Lipid</b>       | <b>2-stearoylglycerophosphocholine</b>    | <b>67</b> | <b>-0.04 (-0.07, 0.00)</b>      | <b>0.028</b>            | <b>-0.03 (-0.08, 0.03)</b>      | <b>0.298</b>        | <b>-0.001</b>        | <b>0.330</b>        |
| <b>Lipid</b>       | <b>2-tetradecenoyl carnitine</b>          | <b>67</b> | <b>-0.05 (-0.09, 0.00)</b>      | <b>0.042</b>            | <b>-0.02 (-0.09, 0.04)</b>      | <b>0.486</b>        | <b>-0.001</b>        | <b>0.718</b>        |
| Lipid              | 1-myristoylglycerophosphocholine          | 67        | -0.03 (-0.06, 0.01)             | 0.122                   | -0.02 (-0.07, 0.03)             | 0.455               | 0.000                | 0.874               |
| Lipid              | octadecanedioate                          | 67        | -0.02 (-0.05, 0.02)             | 0.281                   | -0.01 (-0.06, 0.05)             | 0.852               | -0.001               | 0.628               |
| Lipid              | tauroolithocholate 3-sulfate              | 67        | 0.01 (-0.06, 0.08)              | 0.799                   | 0.04 (-0.05, 0.14)              | 0.373               | -0.006               | 0.049               |
| Lipid              | 4-androsten-3beta,17beta-diol disulfate 2 | 67        | -0.01 (-0.05, 0.04)             | 0.801                   | 0.00 (-0.07, 0.06)              | 0.956               | 0.001                | 0.484               |
| Nucleotide         | inosine                                   | 67        | -0.02 (-0.13, 0.1)              | 0.782                   | -0.03 (-0.19, 0.14)             | 0.745               | -0.003               | 0.495               |
| Nucleotide         | hypoxanthine                              | 67        | 0.00 (-0.03, 0.02)              | 0.715                   | 0.02 (-0.02, 0.05)              | 0.380               | 0.000                | 0.717               |
| <b>Nucleotide</b>  | <b><i>xanthine</i></b>                    | <b>67</b> | <b><i>0.04 (0.02, 0.06)</i></b> | <b><i>0.001</i></b>     | <b><i>0.05 (0.00, 0.09)</i></b> | <b><i>0.035</i></b> | <b><i>-0.001</i></b> | <b><i>0.540</i></b> |
| <b>Peptide</b>     | <b><i>gamma-glutamyltyrosine</i></b>      | <b>67</b> | <b><i>0.04 (0.02, 0.06)</i></b> | <b><i>&lt;0.001</i></b> | <b><i>0.05 (0.02, 0.08)</i></b> | <b><i>0.003</i></b> | <b><i>0.000</i></b>  | <b><i>0.701</i></b> |
| Peptide            | glycylvaline                              | 66        | 0.07 (0.00, 0.14)               | 0.062                   | 0.08 (-0.03, 0.20)              | 0.152               | -0.001               | 0.718               |
| <b>Peptide</b>     | <b>bradykinin, des-arg(9)</b>             | <b>67</b> | <b>0.11 (0.00, 0.21)</b>        | <b>0.043</b>            | <b>0.07 (-0.08, 0.21)</b>       | <b>0.374</b>        | <b>0.000</b>         | <b>0.940</b>        |
| <b>Peptide</b>     | <b>alpha-glutamyltyrosine</b>             | <b>67</b> | <b>-0.06 (-0.11, -0.01)</b>     | <b>0.016</b>            | <b>-0.03 (-0.12, 0.05)</b>      | <b>0.486</b>        | <b>0.000</b>         | <b>0.960</b>        |
| Peptide            | gamma-glutamylglutamate                   | 65        | -0.05 (-0.11, 0.01)             | 0.092                   | 0.00 (-0.10, 0.10)              | 0.974               | -0.002               | 0.407               |
| Peptide            | leucylleucine                             | 67        | 0.02 (-0.03, 0.06)              | 0.393                   | 0.03 (-0.04, 0.10)              | 0.355               | -0.001               | 0.686               |
| Xenobiotics        | salicylate                                | 67        | -0.08 (-0.22, 0.06)             | 0.278                   | -0.14 (-0.38, 0.11)             | 0.277               | 0.014                | 0.060               |
| <b>Xenobiotics</b> | <b>quininate</b>                          | <b>67</b> | <b>0.12 (0.05, 0.20)</b>        | <b>0.002</b>            | <b>0.04 (-0.09, 0.16)</b>       | <b>0.580</b>        | <b>0.000</b>         | <b>0.960</b>        |
| Xenobiotics        | theobromine                               | 67        | 0.00 (-0.07, 0.06)              | 0.968                   | 0.05 (-0.04, 0.15)              | 0.298               | 0.005                | 0.091               |
| Xenobiotics        | saccharin                                 | 67        | -0.03 (-0.14, 0.08)             | 0.561                   | -0.01 (-0.18, 0.15)             | 0.872               | -0.003               | 0.596               |
| Xenobiotics        | thymol sulfate                            | 67        | -0.02 (-0.13, 0.09)             | 0.755                   | -0.07 (-0.23, 0.10)             | 0.444               | -0.001               | 0.788               |

\*: cofactors and vitamins. Nsnp: number of valid genetic instruments after Steiger filtering. IVW, inverse variance weighted method with multiplicative random-effects. Associations of nominal significance in primary analysis ( $P_{IVW} < 0.05$ ) are in **boldface** type. Associations that remained significant in sensitivity analysis ( $P_{\text{weighted-median}} < 0.05$ ) are further in *italic* type.

**Supplementary Table S8.** Direct effects of BMI-associated metabolites on COVID-19 phenotypes conditioning on BMI.

| COVID-19 Outcome | Category          | Metabolites                     | Nsnp      | MVMR IVW Method         |              |
|------------------|-------------------|---------------------------------|-----------|-------------------------|--------------|
|                  |                   |                                 |           | OR (95% CI)             | P            |
| A2               | <b>Amino acid</b> | <b>valine</b>                   | <b>4</b>  | <b>8.89(1.22,64.64)</b> | <b>0.031</b> |
|                  | Lipid             | 1-oleoylglycerophosphocholine   | 10        | 0.72(0.36,1.46)         | 0.364        |
|                  | Lipid             | 2-stearoylglycerophosphocholine | 3         | 0.96(0.46,2.00)         | 0.921        |
|                  | Lipid             | 2-tetradecenoyl carnitine       | 12        | 1.22(0.84,1.75)         | 0.295        |
|                  | Lipid             | heptanoate (7:0)                | 24        | 0.73(0.36,1.48)         | 0.379        |
|                  | Lipid             | taurochenodeoxycholate          | 7         | 0.93(0.69,1.24)         | 0.625        |
|                  | <b>Peptide</b>    | <b>alpha-glutamyltyrosine</b>   | <b>10</b> | <b>1.40(1.02,1.94)</b>  | <b>0.039</b> |
| B2               | Amino acid        | glutamate                       | 3         | 1.14(0.71,1.82)         | 0.596        |
|                  | Nucleotide        | xanthine                        | 3         | 0.88(0.50,1.55)         | 0.655        |
|                  | Peptide           | bradykinin, des-arg(9)          | 11        | 1.07(0.99,1.16)         | 0.106        |
|                  | <b>Peptide</b>    | <b>gamma-glutamyltyrosine</b>   | <b>26</b> | <b>1.62(1.03,2.54)</b>  | <b>0.035</b> |
| C2               | <b>Amino acid</b> | <b>glutamate</b>                | <b>3</b>  | <b>0.82(0.69,0.98)</b>  | <b>0.031</b> |
|                  | Amino acid        | phenol sulfate                  | 7         | 1.00(0.91,1.10)         | 0.95         |
|                  | Lipid             | 2-tetradecenoyl carnitine       | 12        | 1.05(0.96,1.15)         | 0.294        |
|                  | Lipid             | propionylcarnitine              | 21        | 0.95(0.83,1.09)         | 0.47         |
|                  | Peptide           | gamma-glutamyltyrosine          | 26        | 1.16(0.98,1.39)         | 0.089        |
|                  | <b>Peptide</b>    | <b>alpha-glutamyltyrosine</b>   | <b>10</b> | <b>1.10(1.02,1.19)</b>  | <b>0.012</b> |
|                  | Xenobiotics       | quininate                       | 4         | 1.00(0.93,1.07)         | 0.947        |

Associations of nominal significance in primary analysis ( $P_{MV-IVW} < 0.05$ ) are in **boldface** type.

**Supplementary Table S9.** Association between metabolites and COVID-19 phenotypes after adjusting for other metabolites with correlated serum levels.

| COVID-19 Outcome | Metabolite_ID | Metabolite                                | Pearson's Correlation ( <i>r</i> ) | MV-IVW Method |              |              |
|------------------|---------------|-------------------------------------------|------------------------------------|---------------|--------------|--------------|
|                  |               |                                           |                                    | Beta          | SE           | <i>P</i>     |
| A2               | M37203        | 4-androsten-3beta,17beta-diol disulfate 2 | 0.63                               | 0.275         | 0.188        | 0.145        |
|                  | M33973        | epiandrosterone sulfate                   |                                    | -0.181        | 0.121        | 0.133        |
| B2               | M37203        | 4-androsten-3beta,17beta-diol disulfate 2 | 0.63                               | 0.298         | 0.107        | 0.005        |
|                  | <b>M33973</b> | <b>epiandrosterone sulfate</b>            |                                    | <b>-0.206</b> | <b>0.067</b> | <b>0.002</b> |
| C2               | M37203        | 4-androsten-3beta,17beta-diol disulfate 2 | 0.63                               | 0.078         | 0.052        | 0.130        |
|                  | M33973        | epiandrosterone sulfate                   |                                    | -0.018        | 0.033        | 0.577        |
| A2               | <b>M35255</b> | <b>2-stearoylglycerophosphocholine</b>    | 0.75                               | <b>1.980</b>  | <b>0.474</b> | <b>0.000</b> |
|                  | M33960        | 1-oleoylglycerophosphocholine             |                                    | -2.349        | 0.611        | 0.000        |
| B2               | M32322        | glutamate                                 | 0.35                               | 0.264         | 0.271        | 0.330        |
|                  | <b>M02734</b> | <b>gamma-glutamyltyrosine</b>             |                                    | <b>0.477</b>  | <b>0.174</b> | <b>0.006</b> |
| B2               | M32322        | glutamate                                 | 0.61                               | 0.224         | 0.184        | 0.223        |
|                  | M36738        | gamma-glutamylglutamate                   |                                    | 0.105         | 0.048        | 0.031        |
| B2               | <b>M02734</b> | <b>gamma-glutamyltyrosine</b>             | 0.32                               | <b>0.529</b>  | <b>0.147</b> | <b>0.000</b> |
|                  | M36738        | gamma-glutamylglutamate                   |                                    | 0.089         | 0.070        | 0.204        |
| B2               | M03127        | hypoxanthine                              | 0.28                               | 0.833         | 0.225        | 0.000        |
|                  | <b>M32739</b> | <b>xanthine</b>                           |                                    | <b>-1.074</b> | <b>0.303</b> | <b>0.000</b> |
| C2               | <b>M02734</b> | <b>gamma-glutamyltyrosine</b>             | 0.35                               | <b>0.220</b>  | <b>0.074</b> | <b>0.003</b> |
|                  | M32322        | glutamate                                 |                                    | -0.059        | 0.114        | 0.604        |
| C2               | M32452        | propionylcarnitine                        | 0.37                               | -0.124        | 0.059        | 0.035        |
|                  | <b>M02734</b> | <b>gamma-glutamyltyrosine</b>             |                                    | <b>0.208</b>  | <b>0.069</b> | <b>0.002</b> |

Associations of nominal significance in primary analysis ( $P_{MV-IVW} < 0.05$ ) are in **boldface** type. No correlated metabolites were found for alpha-glutamyltyrosine.
